# Supplementary material for: Exploring the speed and performance of molecular replacement with AMPLE using QUARK ab initio protein models
Source: PubMed Central journal article supplement (PMC4321487; doi:10.1107/s1399004714025784), 2015-01-23
Supplement: d-71-00338-sup1.pdf [file d-71-00338-sup1.pdf]

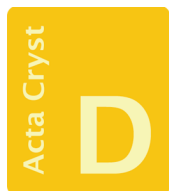

BIOLOGICAL  
CRYSTALLOGRAPHY

**Volume 71 (2015)**

**Supporting information for article:**

**Exploring the speed and performance of molecular replacement  
with *AMPLE* using *QUARK ab initio* protein models**

**Ronan M. Keegan, Jaclyn Bibby, Jens Thomas, Dong Xu, Yang Zhang, Olga  
Mayans, Martyn D. Winn and Daniel J. Rigden**

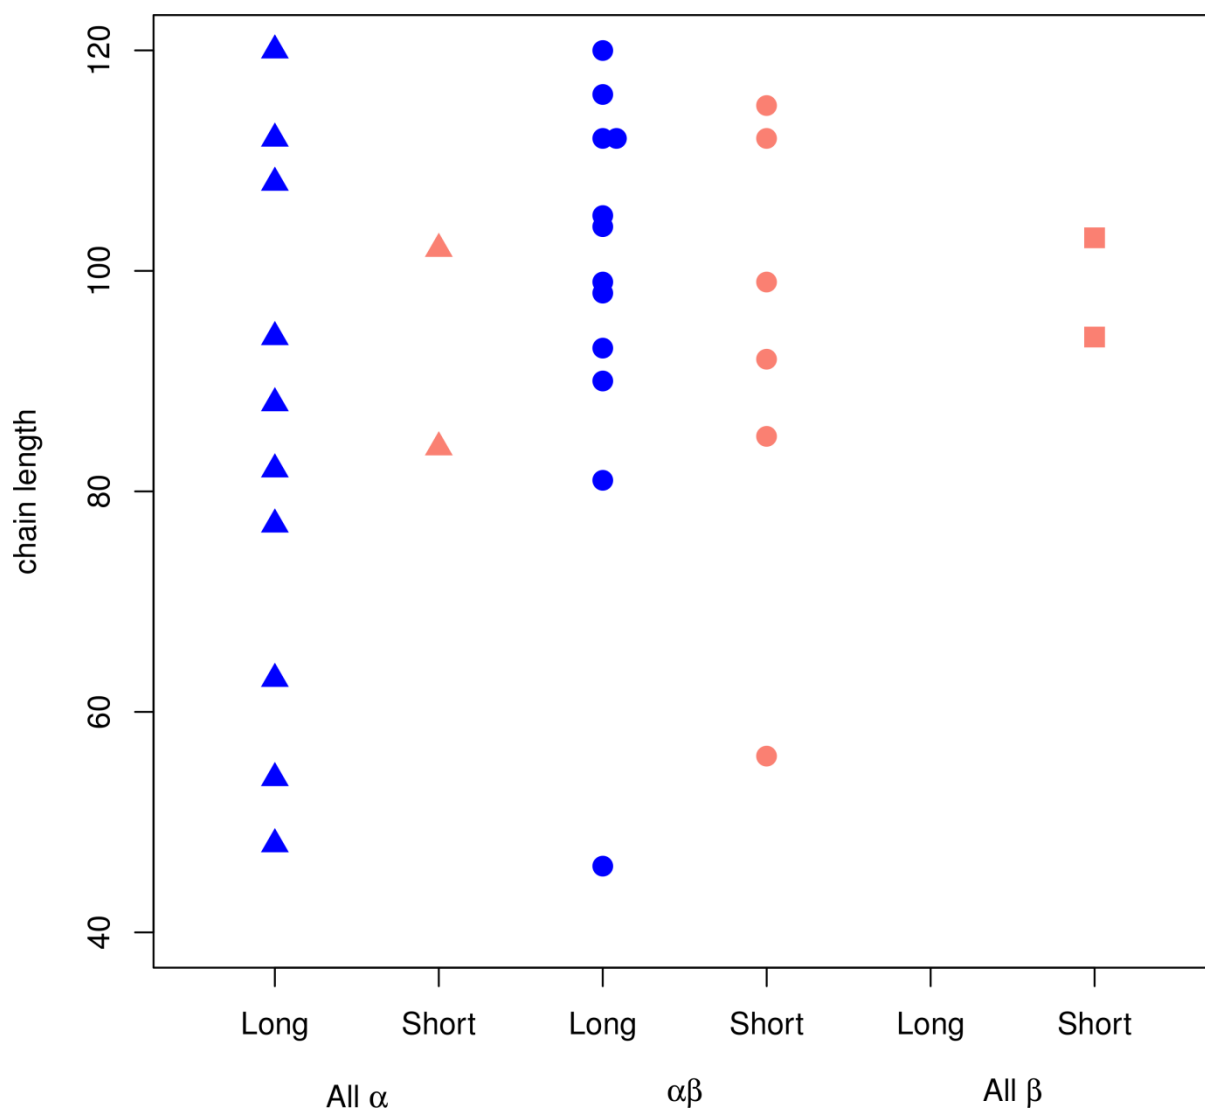

**Figure S1** Secondary structure class and length of targets solved in either Run 3 ('Long' up to 12 hours Phaser) or Run 4 ('Short' 5 minutes Phaser) but not in the other.
